# Supplementary material
Source: Springer Nature journal article supplement (https://www.springermedizin.de/resource/supplementary/12904_2010_102_MOESM1_ESM.pdf/9517568)

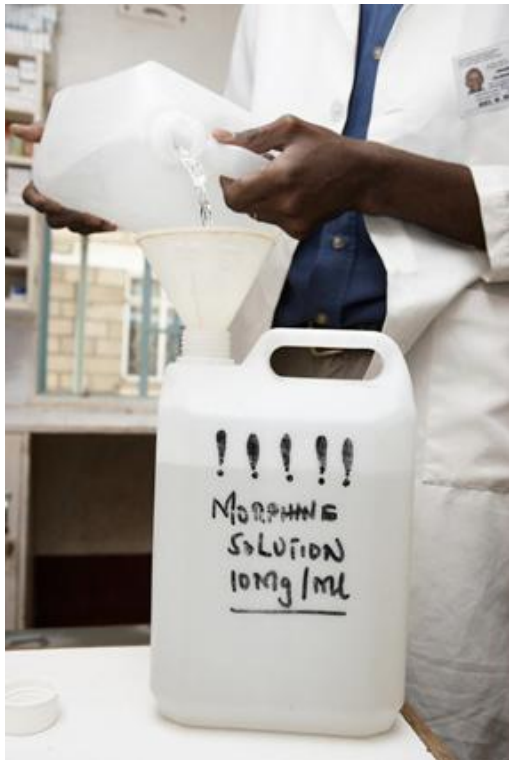

!!!!!!  
MORPHINE  
SOLUTION  
10mg/ml

Supplement: MOESM1 [file 9517568]
